# Supplementary material
Source: publisher site journal article supplement (https://www.dovepress.com/article/479810)
Supplement: Supplementary file 1 [file get_supplementary_file.php]

Table S1. Locations of tumor progression and treatments of tumor progression in the two groups before and after PSM.

|  |  | Before PSM |  |  | After PSM |  |
| --- | --- | --- | --- | --- | --- | --- |
|  | SR group  （N=105） | NASR group  （N=33） | P Value | SR group  （N=58） | NASR group  （N=29） | P Value |
| **Locations of progression** |  |  | P=0.001 |  |  | P=0.001 |
| Intrahepatic only (n, %) | 46(43.8%) | 5(15.2%) | P<0.05 | 24(41.4%) | 5(17.2%) | P<0.05 |
| extrahepatic only (n, %) | 4(3.8%) | 4(12.1%) | P>0.05 | 2(3.4%) | 3(10.3%) | P>0.05 |
| both have (n, %) | 30(28.6%) | 2(6.1%) | P<0.05 | 17(29.3%) | 1(3.4%) | P<0.05 |
| No progression | 25(23.8%) | 22(66.6%) | P<0.05 | 15(25.9%) | 20(69.0%) | P<0.05 |
| **Treatment method after progression** |  |  | P=0.153 |  |  | P=0.215 |
| SR or radiofrequency ablation, n (%) | 10(12.5%) | 0(0%) | P>0.05 | 5(11.6%) | 2(22.2%) | P>0.05 |
| TACE, n (%) | 22(27.5%) | 2(18.2%) | P>0.05 | 12(27.9%) | 1(11.1%) | P>0.05 |
| Systematic drug treatment, n (%) | 13(16.2%) | 1(9.1%) | P>0.05 | 8(18.6%) | 1(11.1%) | P>0.05 |
| Triple therapy, n (%) | 20(25.0%) | 2(18.2%) | P>0.05 | 10(23.3%) | 5(55.6%) | P>0.05 |
| Others or no treatment (n, %) | 15(18.8%) | 6(54.5%) | P<0.05 | 8(18.6%) | 0(0.0%) | P>0.05 |

PSM, propensity score matching, Triple therapy, transcatheter arterial chemoembolization Combined with Tyrosine Kinase Inhibitors Plus Immune Checkpoint Inhibitors; TACE, transcatheter arterial chemoembolization; N, number. SR: surgical resection; NASR: neoadjuvant therapy and surgical resection.

Table S2. Summary of adverse events about the NASR therapy group

|  |  | Adverse events |  |
| --- | --- | --- | --- |
| Adverse events |  | N=33 |  |
|  | Any grade, N (%) | Grade1/2, N (%) | Grade3/4, N (%) |
| Any Adverse events | 30 (90.9%) | 22 (66.6%) | 8 (24.2%) |
| Hypertension | 13(39.3%) | 10(30.3%) | 3(9.1%) |
| hyperglycemia | 5(15.1%) | 4(12.1%) | 1(3.0%) |
| Blood Total bilirubin increase | 8(24.2%) | 6(18.1%) | 3(6.1%) |
| Hypoalbuminemia | 5(15.1%) | 5(15.1%) | 0(0%) |
| Aspartate aminotransferase increase | 28(81.8%) | 25(75.7%) | 3(6.1%) |
| Alanine aminotransferase increase | 19(78.7%) | 16(48.4%) | 6(30.3%) |
| leukopenia | 10(30.3%) | 9(27.3%) | 1(3.0%) |
| Platelet count decrease | 10(30.3%) | 8(24.2%) | 2(6.1%) |
| Decreased appetite | 5(15.1%) | 5(15.1%) | 0(0.0%) |
| Pyrexia | 15(45.4%) | 15(45.4%) | 0(0.0%) |
| Nausea and vomiting | 16(48.5%) | 14(42.4%) | 2(6.1%) |
| Diarrhea | 4(12.1%) | 4(12.1%) | 0(0.0%) |
| Astriction | 2(6.1%) | 2(6.1%) | 0(0.0%) |
| Hand-foot skin reaction | 6(18.2%) | 5(15.1%) | 1(3.0%) |
| Abdominal pain | 7(21.2%) | 6(18.2%) | 1(3.0%) |
| Gastrointestinal bleeding | 1(3.0%) | 0(0.0%) | 1(3.0%) |

N, number. NASR: neoadjuvant therapy and surgical resection.
